# Supplementary material for: COVIDScholar: An automated COVID-19 research aggregation and analysis platform
Source: PubMed Central journal article supplement (PMC9891495; doi:10.1371/journal.pone.0281147), 2023-02-01
Supplement: pone.0281147.s001.pdf [file pone.0281147.s001.pdf]

| <b>Biological &amp; Chemical Sciences</b>   | <b>Medical Sciences</b>       | <b>Public Health</b>                | <b>Physical Sciences</b>                        | <b>Humanities/Social Sciences</b>       |
|---------------------------------------------|-------------------------------|-------------------------------------|-------------------------------------------------|-----------------------------------------|
| Virology                                    | Pathophysiology               | Epidemiology                        | Engineering                                     | Education                               |
| Immunology                                  | Genetics                      | Biostatistics/<br>Disease Modelling | Physics                                         | Psychology                              |
| Genetics/<br>Genomics/<br>Epigenetics       | Clinical<br>Management        | Health Policy                       | Data Science                                    | Anthropology                            |
| Biomedical<br>Engineering/<br>Biotechnology | Infectious Disease            | Nutrition/ Food<br>Science          | Mathematics<br>Journalism and<br>Communications | Agriculture &<br>Resource<br>Management |
| Vaccinology                                 | Rheumatology                  | Community Health                    | Computational<br>Sciences                       | Law & Ethics                            |
| Toxicology                                  | Pulmonology/<br>Critical Care | Environmental<br>Health             | Materials Science                               | Economics                               |
| Molecular & Cell<br>Biology                 | Geriatrics                    | Occupational Health                 | Chemistry &<br>Chemical<br>Engineering          | Political Science                       |
| Integrative Biology                         | Emergency<br>Medicine         | Implementation<br>Science           | Statistics                                      | International<br>Relations              |
| Ecology, Evolution,<br>Biodiversity         | Cardiology                    | Health Diplomacy                    | Climate Science                                 | Design/ Arts/<br>Literature/ Music      |
| Plant Biology                               | Pediatrics                    | Health<br>Communications            | Earth Sciences/<br>Geosciences                  | Sociology                               |
| Biochemistry                                | Obstetrics &<br>Gynecology    | Behavioural Health                  | Zoology                                         | Business                                |
| Pathology/<br>Laboratory<br>Medicine        | Nephrology                    | Non-Communicable<br>Diseases        | Botany                                          | Gender, Sexuality &<br>Women's Studies  |
| Zoonotic Diseases                           | Clinical Trials               |                                     |                                                 | History                                 |
|                                             | Primary Care                  |                                     |                                                 | Area Studies                            |
|                                             | Pharmacology                  |                                     |                                                 | Philosophy                              |

**S1 Table:** The 5 top-level disciplines (boldface) and corresponding composite fields into which COVIDScholar's text corpus is classified.
