# Supplementary material for: COVIDScholar: An automated COVID-19 research aggregation and analysis platform
Source: PubMed Central journal article supplement (PMC9891495; doi:10.1371/journal.pone.0281147), 2023-02-01
Supplement: pone.0281147.s002.pdf [file pone.0281147.s002.pdf]

| Topic number | Assigned Topic Name                     | Keywords                                                                                                                                                                                                                                                                     |
|--------------|-----------------------------------------|------------------------------------------------------------------------------------------------------------------------------------------------------------------------------------------------------------------------------------------------------------------------------|
| 1            | Symptoms, treatment, outcomes           | patient, covid, disease, hospital, severe, clinical, study, case, high, risk, symptom, coronavirus, infection, mortality, associate, care, day, group, acute, outcome, treatment, respiratory, age, include, result, year, report, conclusion, pneumonia, admission          |
| 2            | Community impacts                       | pandemic, health, covid, care, use, study, experience, social, survey, healthcare, student, practice, work, support, impact, participant, child, result, need, on-line, face, medical, service, response, challenge, self, provide, change, community, include               |
| 3            | Transmission and modeling               | covid, pandemic, case, health, country, population, datum, rate, number, disease, outbreak, lockdown, measure, impact, risk, use, time, increase, epidemic, public, high, study, spread, result, model, period, state, death, infection, coronavirus                         |
| 4            | Virology and mechanism                  | cov, sar, infection, virus, coronavirus, covid, respiratory, disease, viral, syndrome, severe, ace, acute, cause, human, cell, variant, immune, transmission, novel, gene, pandemic, influenza, vaccine, expression, ma, sample, sequence, clinical, receptor                |
| 5            | Emerging challenges                     | research, study, effect, human, analysis, use, development, approach, social, role, paper, suggest, process, different, provide, change, new, present, information, theory, discuss, model, base, network, understand, relationship, individual, science, aniotessin, medium |
| 6            | Clinical trials and meta-studies        | study, use, covid, trial, treatment, clinical, review, analysis, effect, control, research, group, outcome, result, risk, datum, evicence, include, report, method, participant, search, intervention, base, systematic, safety, efficacy, meta, increase, protocol          |
| 7            | Therapeutics                            | protein, drug, use, cell, virus, target, bind, antiviral, viral, inhibitor, treatment, potential, activity, therapeutic, study, molecular, compound, interaction, ma, human, structure, anti, covid, base, host, protease, replication, effective, effect, complex           |
| 8            | Testing                                 | model, test, use, method, performance, result, covid, base, testing, detection, datum, sensitivity, sample, pcr, time, positive, diagnostic, prediction, purpose, predict, accuracy, learning, image, value, parameter, une, algorithm, pregnant, machine, simulation        |
| 9            | Vaccines                                | vaccine, antibody, cell, vaccination, cov, sar, response, assay, air, dose, level, immune, anti, plasma, antigen, blood, igg, immunity, serum, concentration, specific, spike, high, rbd, sample, low, induce, neutralizing, individual, result                              |
| 10           | Mental health effects, non-English text | anxiety, menal, dan, stress, depression, psychological, symptom dalam, hcw, yang, dengan, untuk, disorder, distress, health, sleep, worker, obat, covid, ini, dari, adalah, trauma, associate, pada, factor, scale, fear, sebagai, depressive                                |

**S2 Table:** LDA Topics and Keywords
